# Supplementary material for: Causal relationship between antihypertensive drugs and Hashimoto’s thyroiditis: a drug-target Mendelian randomization study
Source: Front Endocrinol (Lausanne). 2024 Oct 7;15:1419346. doi: 10.3389/fendo.2024.1419346 (PMC11491371; doi:10.3389/fendo.2024.1419346)
Supplement: Supplementary file 3 [file Table1.xlsx]

## Sheet: Table S1
Table S1. Drug classes, substances and targets with their DrugBank ID.			TOC
Drug	Substance	Drugbank_id	Genes
Adrenergic neuron blockers	betanidine	DB00217	ADRA2B;ADRA2C;KCNJ1;ADRA2A
Adrenergic neuron blockers	debrisoquine	DB04840	SLC6A2
Adrenergic neuron blockers	guanethidine	DB01170	SLC6A2
Alpha-adrenoceptor blockers	cositam
Alpha-adrenoceptor blockers	doxazosin	DB00590	ADRA1B;ADRA1D;ADRA1A
Alpha-adrenoceptor blockers	faramsil
Alpha-adrenoceptor blockers	indoramin	DB08950
Alpha-adrenoceptor blockers	metirosine	DB00765	TH
Alpha-adrenoceptor blockers	phenoxybenzamine	DB00925	ADRA1A;ADRA2A
Alpha-adrenoceptor blockers	phentolamine	DB00692	ADRA2A;ADRA1A
Alpha-adrenoceptor blockers	prazosin	DB00457	ADRA1D;ADRA1B;ADRA1A
Alpha-adrenoceptor blockers	tamsulosin	DB00706	ADRA1A
Alpha-adrenoceptor blockers	terazosin	DB01162	ADRA1B;ADRA1D;ADRA1A
Alpha-adrenoceptor blockers	terazosine	DB01162	ADRA1A;ADRA1B;ADRA1D
Angiotensin-II receptor antagonists	azilsartan	DB08822	AGTR1
Angiotensin-II receptor antagonists	candesartan	DB13919	AGTR1
Angiotensin-II receptor antagonists	eprosartan	DB00876	AGTR1
Angiotensin-II receptor antagonists	irbesartan	DB01029	AGTR1
Angiotensin-II receptor antagonists	losartan	DB00678	AGTR1
Angiotensin-II receptor antagonists	olmesartan	DB00275	AGTR1
Angiotensin-II receptor antagonists	telmisartan	DB00966	PPARG;AGTR1
Angiotensin-II receptor antagonists	valsartan	DB00177	AGTR1
Angiotensin converting enzyme inhibitors	captopril	DB01197	ACE
Angiotensin converting enzyme inhibitors	cilazapril	DB01340	ACE
Angiotensin converting enzyme inhibitors	enalapril	DB00584	ACE
Angiotensin converting enzyme inhibitors	fosinopril	DB00492	ACE
Angiotensin converting enzyme inhibitors	imidapril	DB11783
Angiotensin converting enzyme inhibitors	lisinopril	DB00722	ACE
Angiotensin converting enzyme inhibitors	moexipril	DB00691	ACE;ACE2
Angiotensin converting enzyme inhibitors	perindopril	DB00790	ACE
Angiotensin converting enzyme inhibitors	quinapril	DB00881	ACE
Angiotensin converting enzyme inhibitors	ramipril	DB00178	ACE
Angiotensin converting enzyme inhibitors	trandolapril	DB00519	ACE
Beta-adrenoceptor blockers	acebutolol	DB01193	ADRB1
Beta-adrenoceptor blockers	atenolol	DB00335	ADRB1
Beta-adrenoceptor blockers	betaxolol	DB00195	ADRB1
Beta-adrenoceptor blockers	bisoprolol	DB00612	ADRB1
Beta-adrenoceptor blockers	carteolol	DB00521	ADRB1;ADRB2
Beta-adrenoceptor blockers	carvedilol	DB01136	ADRB1;ADRA1A
Beta-adrenoceptor blockers	celiprolol	DB04846	ADRB2;ADRB1
Beta-adrenoceptor blockers	isoprenaline	DB01064	ADRB3;ADRB1;ADRB2
Beta-adrenoceptor blockers	labetalol	DB00598	ADRA1A;ADRA1D;ADRB2;ADRA1B;ADRB1
Beta-adrenoceptor blockers	metoprolol	DB00264	ADRB1
Beta-adrenoceptor blockers	nadolol	DB01203	ADRB1
Beta-adrenoceptor blockers	nebivolol	DB04861	ADRB1
Beta-adrenoceptor blockers	oxprenolol	DB01580	ADRB1
Beta-adrenoceptor blockers	pindolol	DB00960	ADRB1;ADRB2
Beta-adrenoceptor blockers	practolol	DB01297	ADRB1
Beta-adrenoceptor blockers	propranolol	DB00571	ADRB1
Beta-adrenoceptor blockers	sotalol	DB00489	KCNH2;ADRB2;ADRB1
Beta-adrenoceptor blockers	timolol	DB00373	ADRB1;ADRB2
Calcium channel blockers	amlodipine	DB00381	CACNA1D;CACNA1C;CACNB2;CACNA2D1;CACNA1S
Calcium channel blockers	diltiazem	DB00343	CACNG1
Calcium channel blockers	felodipine	DB01023	CACNA1C;CACNA1D;CACNB2;CACNA2D1;CACNA1S
Calcium channel blockers	isradipine	DB00270	CACNA1D;CACNA2D2;CACNA2D1;CACNA1S;CACNB2;CACNA1C;CACNA1H
Calcium channel blockers	lacidipine	DB09236	CACNB3;CACNB4;CACNA1S;CACNB2;CACNA1F;CACNA1D;CACNB1;CACNA1C
Calcium channel blockers	lercanidipine	DB00528	CACNG1
Calcium channel blockers	lidoflazine
Calcium channel blockers	mibefradil	DB01388	CACNA1I;CACNB3;CACNB1;CACNA1G;CACNB2;CACNA1C;CACNB4;CACNA1H;CACNA1F;CACNA1D;CACNA1S
Calcium channel blockers	nicardipine	DB00622	CACNB2;CACNA2D1;CACNA1C;CACNA1D
Calcium channel blockers	nifedipine	DB01115	CACNA2D1;CACNA1S;CACNA1C;CACNB2;CACNA1D
Calcium channel blockers	nimodipine	DB00393	CACNA1S;CACNB2;CACNB4;CACNA1C;CACNA1D;CACNB1;CACNB3;CACNA1F
Calcium channel blockers	nisoldipine	DB00401	CACNA1S;CACNA1C;CACNB2;CACNA1D;CACNA2D1
Calcium channel blockers	perhexiline	DB01074	CPT2;CPT1A
Calcium channel blockers	prenylamine	DB04825
Calcium channel blockers	verapamil	DB00661	CACNB4;CACNA1S;CACNB1;CACNB3;CACNA1C;CACNB2;CACNA1F;CACNA1D
Loop diuretics	bumetanide	DB00887	SLC12A5;SLC12A4;SLC12A1;SLC12A2
Loop diuretics	etacrynic
Loop diuretics	furosemide	DB00695	SLC12A1
Loop diuretics	piretanide	DB02925
Loop diuretics	torasemide	DB00214	SLC12A1
Aldosterone antagonists	amiloride	DB00594	SCNN1D;SCNN1A;SCNN1G;SCNN1B
Aldosterone antagonists	eplerenone	DB00700	NR3C2
Aldosterone antagonists	spironolactone	DB00421	NR3C2
Aldosterone antagonists	triamterene	DB00384	SCNN1G;SCNN1A;SCNN1B
Thiazides and related diuretics	bendroflumethiazide	DB00436	SLC12A3;KCNMA1
Thiazides and related diuretics	chlorothiazide	DB00880	CA1;SLC12A3;CA2
Thiazides and related diuretics	chlortalidone	DB00310	SLC12A1
Thiazides and related diuretics	cyclopenthiazide	DB13532
Thiazides and related diuretics	hydrochlorothiazide	DB00999	SLC12A3;KCNMA1
Thiazides and related diuretics	hydroflumethiazide	DB00774	SLC12A1
Thiazides and related diuretics	indapamide	DB00808	SLC12A3
Thiazides and related diuretics	mefruside
Thiazides and related diuretics	meprobamate	DB00371	GABRA3;GABRA2;GABRA1;GABRB3;GABRB1;GABRA4;GABRB2;GABRQ;GABRA5;GABRG1;GABRD;GABRG3;GABRG2;GABRA6;GABRP;GABRE
Thiazides and related diuretics	methyclothiazide	DB00232	SLC12A1
Thiazides and related diuretics	metolazone	DB00524	SLC12A3
Thiazides and related diuretics	polythiazide	DB01324	SLC12A3
Thiazides and related diuretics	potassium chloride	DB00761
Thiazides and related diuretics	xipamide
